# Supplementary material
Source: MDPI journal article supplement (https://www.mdpi.com/2073-4344/14/4/280)
Supplement: s1 [file s1]

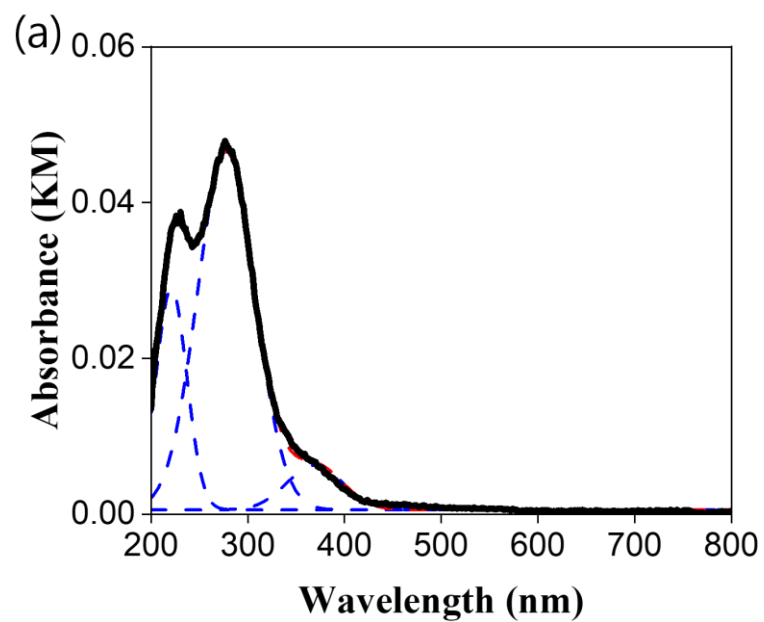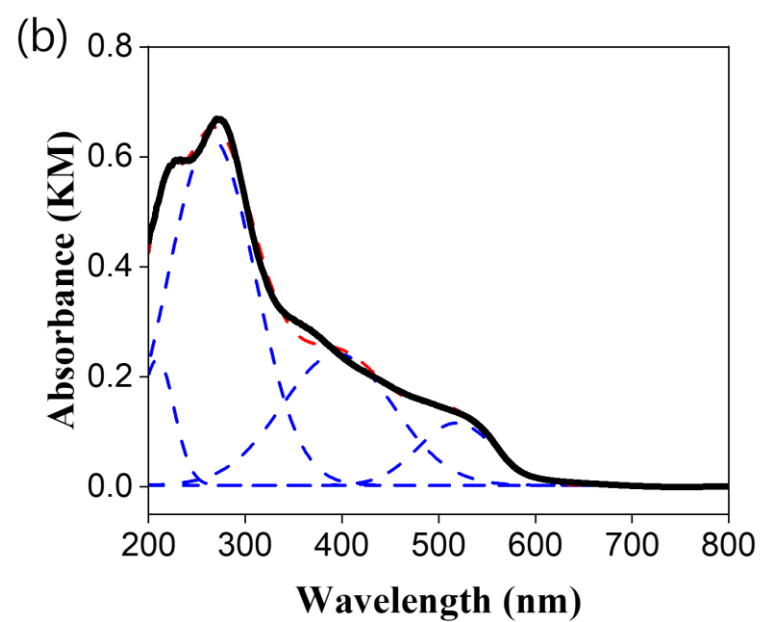

**Figure S1.** UV-vis spectra of H-ZSM-5 (a) and 0.52% Fe-ZSM-5 (b). The raw data and the deconvoluted data are shown as a black line and a dashed line, respectively.

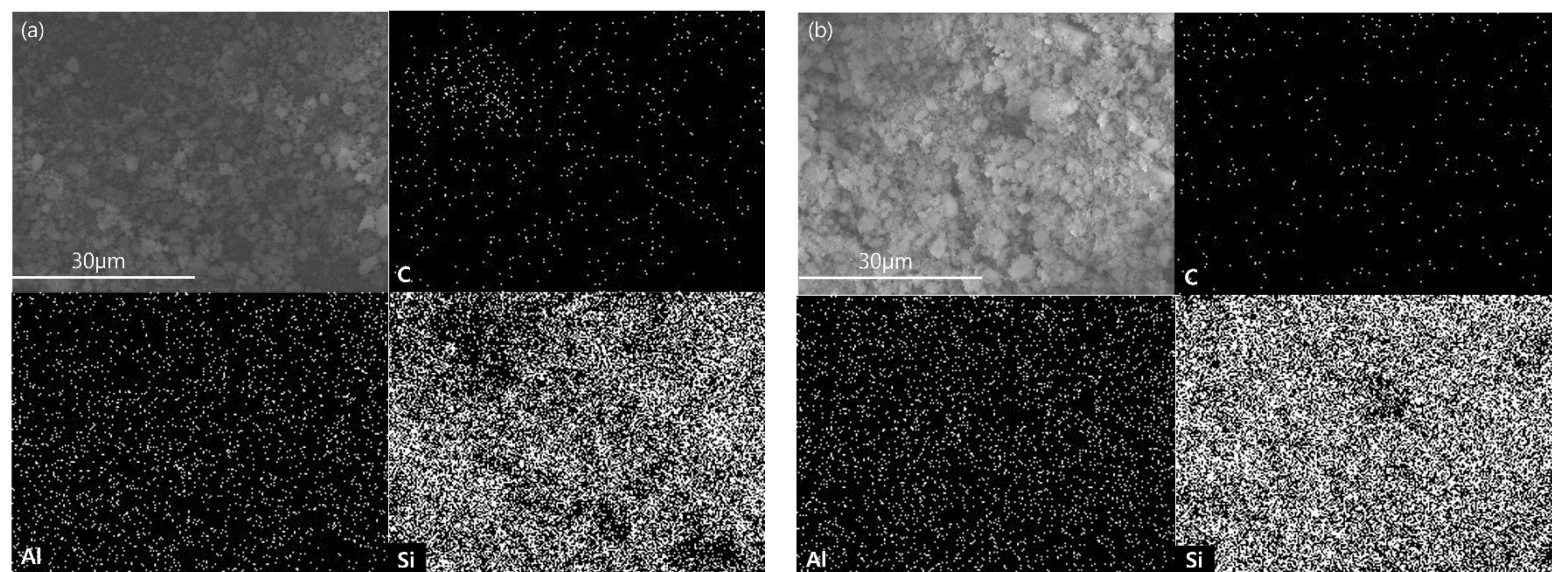

**Figure S2.** SEM-EDX results of (a) C0.45-H-ZSM-5, (b) C1.08-Fe-ZSM-5

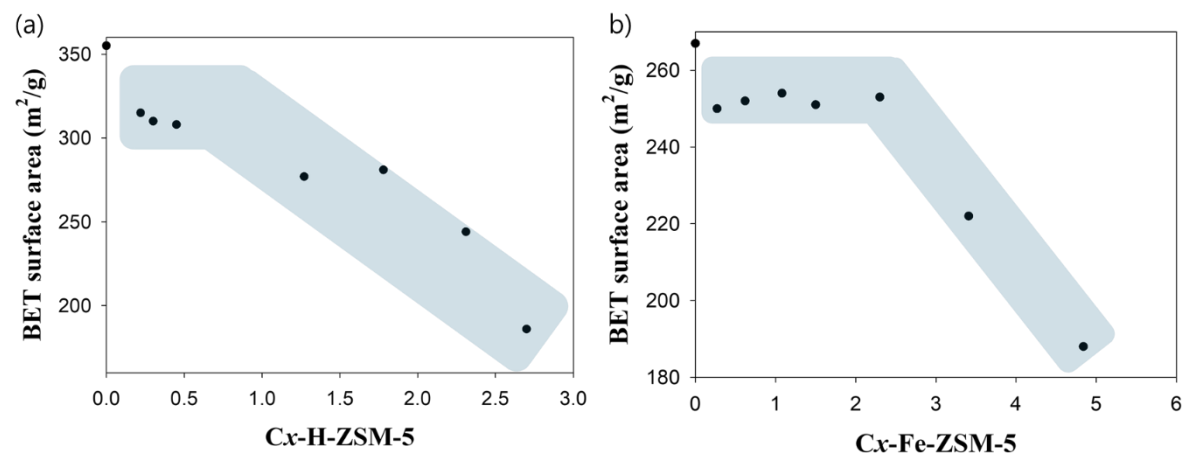

**Figure S3.** The changes in surface area according to the carbon content in (a) Cx-H-ZSM-5 and (b) Cx-Fe-ZSM-5.

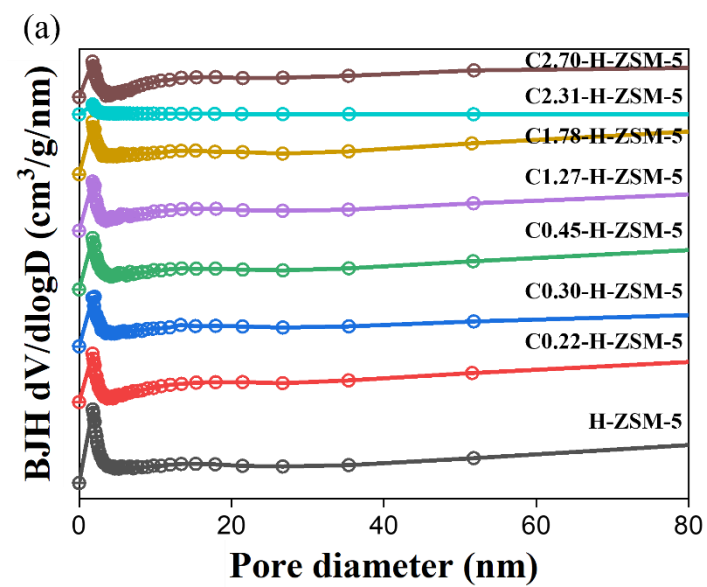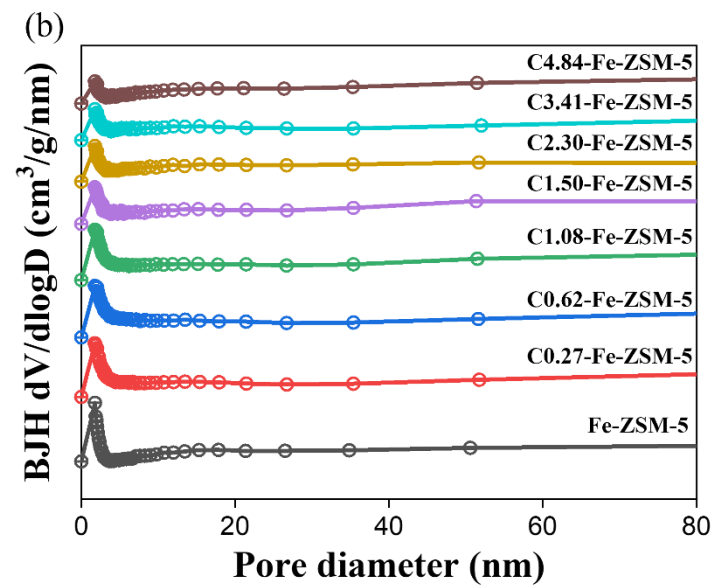

Figure S4. The pore size distribution of (a) Cx-H-ZSM-5 and (b) Cx-Fe-ZSM-5.

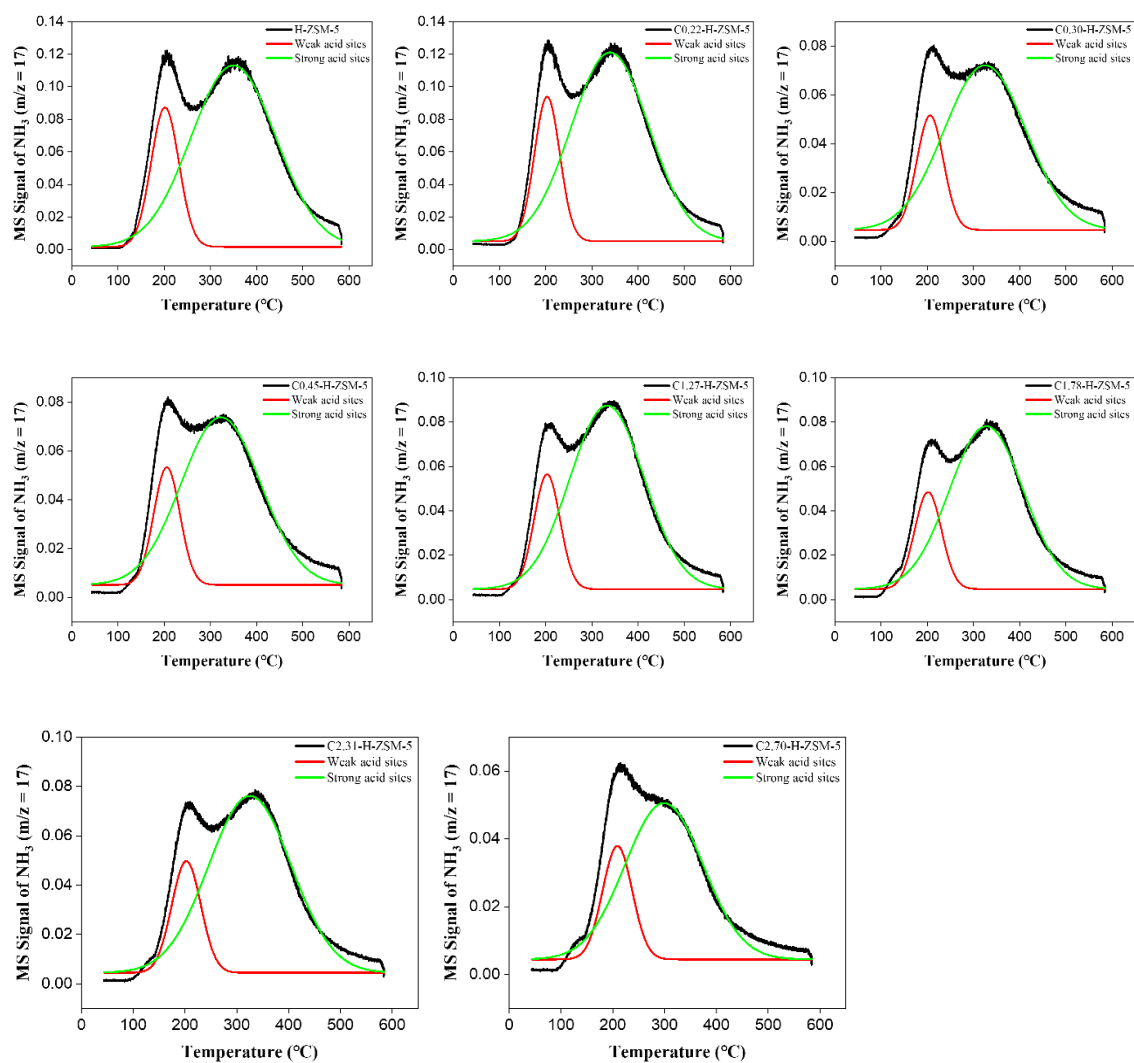

**Figure S5.** Deconvolution of  $\text{NH}_3$ -TPD profiles for H-ZSM-5 and carbon-coated H-ZSM-5 with different carbon contents.

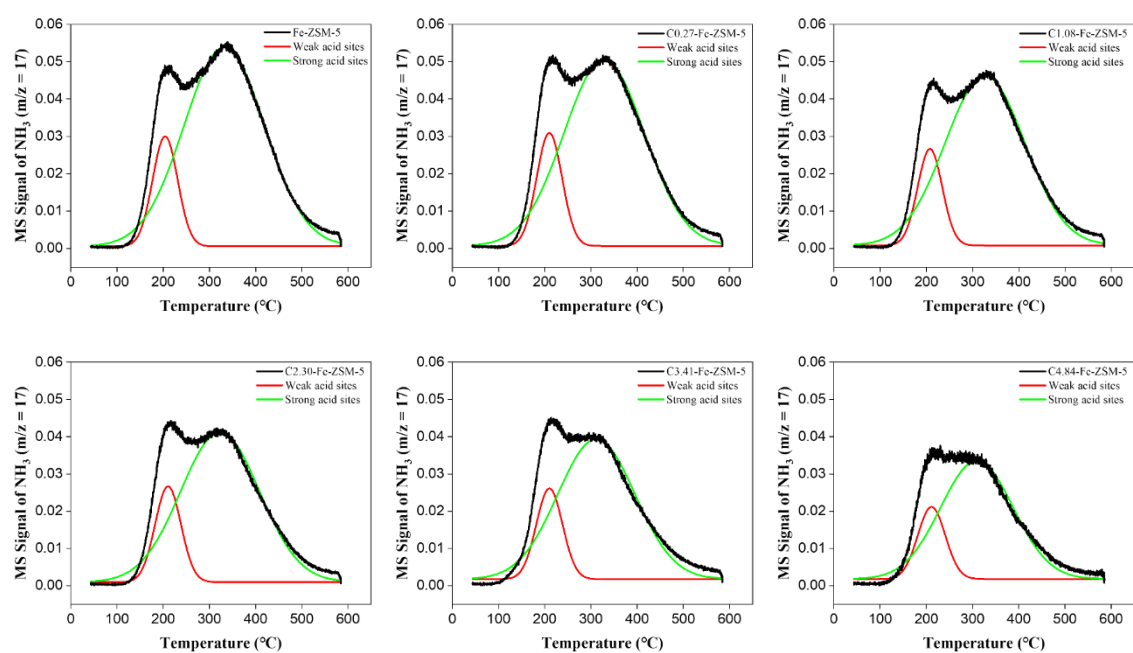

**Figure S6.** Deconvolution of  $\text{NH}_3$ -TPD profiles for Fe-ZSM-5 and carbon-coated Fe-ZSM-5 with different carbon contents.

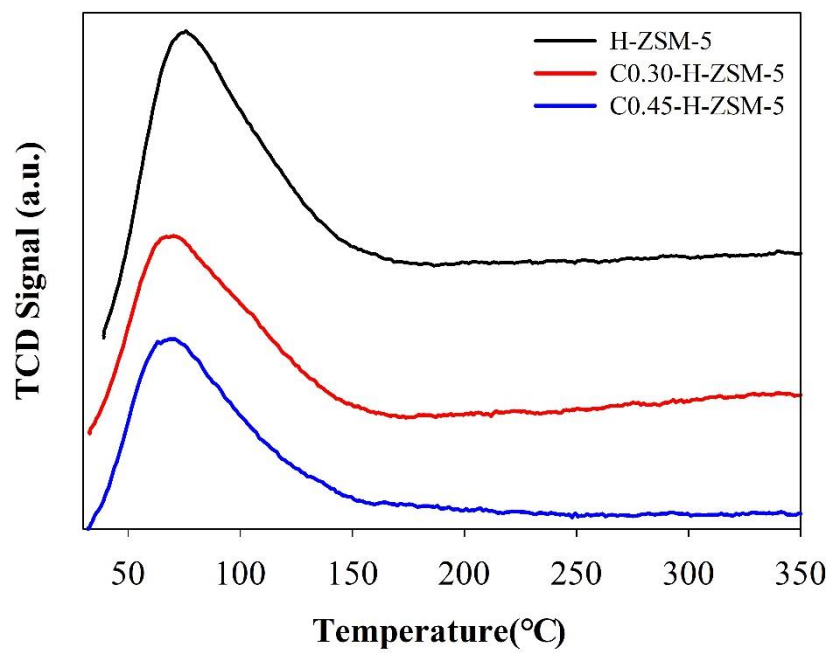

**Figure S7.** H<sub>2</sub>O-TPD profiles for H-ZSM-5 and carbon-coated H-ZSM-5 with different carbon contents.

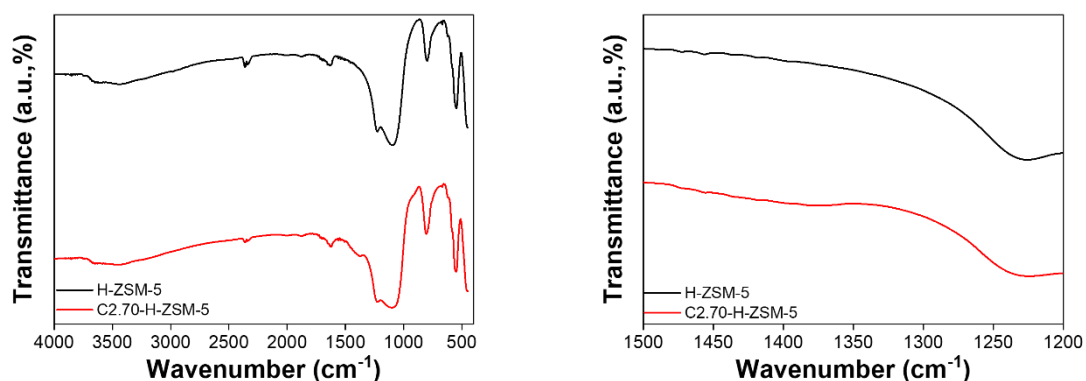

**Figure S8.** FT-IR spectra for H-ZSM-5 and carbon-coated H-ZSM-5 (C2.70-H-ZSM-5).

The FT-IR spectra of H-ZSM-5 and carbon-coated H-ZSM-5 show the bands at 1085–1100  $\text{cm}^{-1}$  and 798–810  $\text{cm}^{-1}$  due to the zeolite framework, i.e., the asymmetric and symmetric vibration modes of T–O–T (T = Si and Al) groups [1]. The broad but distinct vibration band at 542–552  $\text{cm}^{-1}$  is attributed to the asymmetric stretching mode of the double-five ring in ZSM-5 [1]. Also, the broad band at 3413  $\text{cm}^{-1}$  and the sharp peak at 1635  $\text{cm}^{-1}$  are attributed to the structural hydroxyl groups and bending mode of physically adsorbed water, respectively [1]. The weak band at 1377  $\text{cm}^{-1}$  observed over carbon-coated H-ZSM-5 (C2.70-H-ZSM-5) can be ascribed to the bending mode of vibration of –C–H ( $\text{CH}_3$ ) [2]. This species may be due to a carbon species formed through the polymerization and subsequent thermal decomposition of furfuryl alcohol.



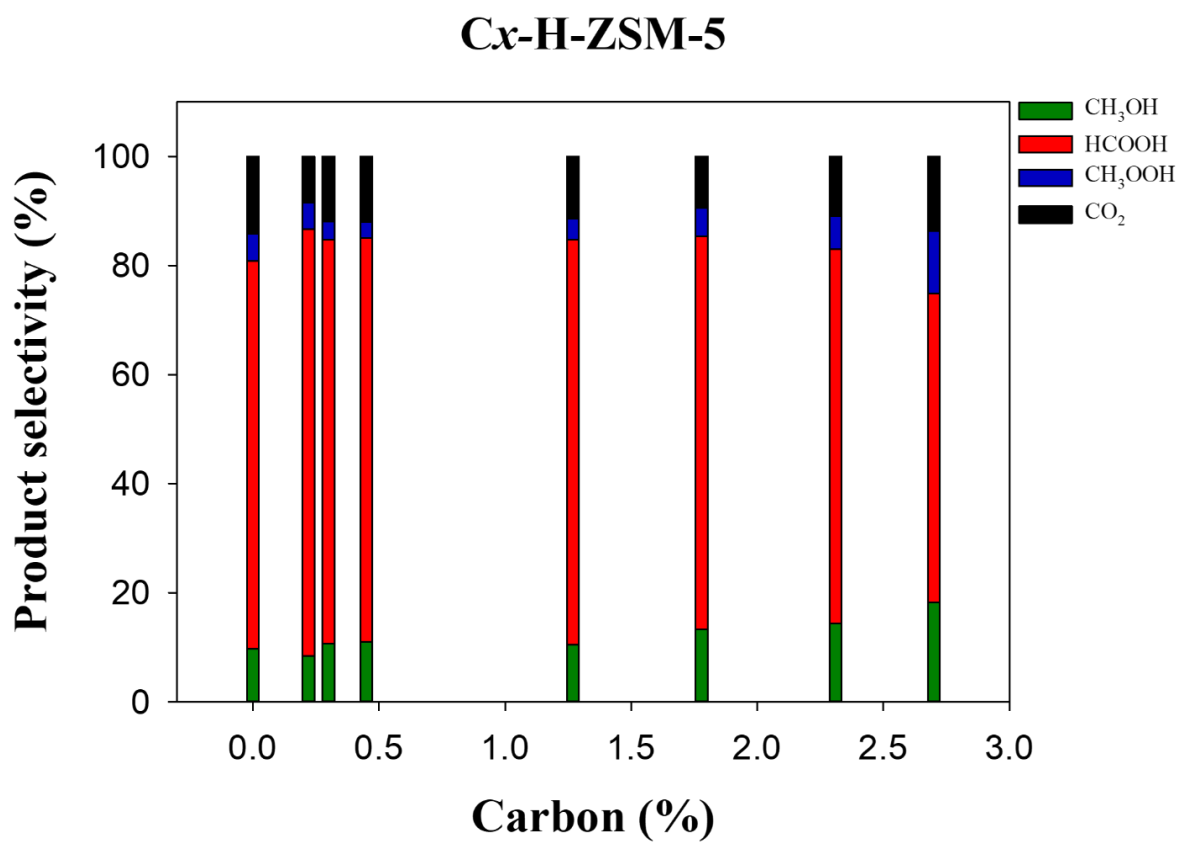

**Figure S9.** Product selectivity for partial oxidation of methane with H<sub>2</sub>O<sub>2</sub> over H-ZSM-5 and Cx-H-ZSM-5.

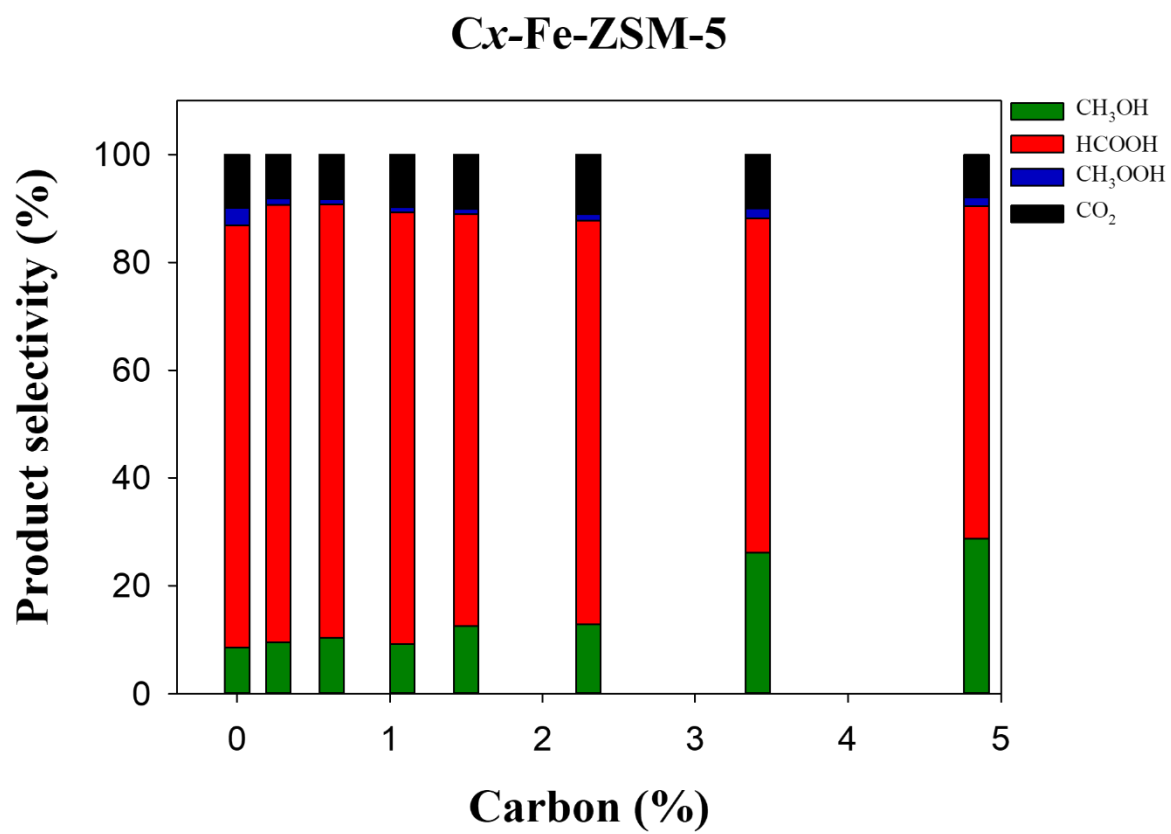

**Figure S10.** Product selectivity for partial oxidation of methane with  $\text{H}_2\text{O}_2$  over Fe-ZSM-5 and Cx-Fe-ZSM-5.

**Table S1.** The fraction of UV-vis band for H-ZSM-5 and 0.52% Fe-ZSM-5.

| Catalyst       | Fraction of UV-vis band (%) |            |         |
|----------------|-----------------------------|------------|---------|
|                | 250~350 nm                  | 350~450 nm | >450 nm |
| H-ZSM-5        | 89                          | 11         | -       |
| 0.52% Fe-ZSM-5 | 59                          | 31         | 10      |

**Table S2.** The surface acid properties of H-ZSM-5 and carbon-coated H-ZSM-5 with different carbon contents.

| Catalyst      | Weak acid sites |      |          | Strong acid sites |      |          | Desorbed NH <sub>3</sub><br>mmol/g <sub>cat</sub> |
|---------------|-----------------|------|----------|-------------------|------|----------|---------------------------------------------------|
|               | Temp. (°C)      | Area | Area (%) | Temp. (°C)        | Area | Area (%) |                                                   |
| H-ZSM-5       | 201             | 6.46 | 20.2     | 349               | 25.6 | 79.8     | 1.49                                              |
| C0.22-H-ZSM-5 | 202             | 6.10 | 20.0     | 339               | 24.5 | 80.0     | 1.16                                              |
| C0.30-H-ZSM-5 | 205             | 3.38 | 18.4     | 324               | 15.0 | 81.6     | 0.862                                             |
| C0.45-H-ZSM-5 | 205             | 3.42 | 18.8     | 322               | 14.8 | 81.2     | 0.880                                             |
| C1.27-H-ZSM-5 | 202             | 3.63 | 17.9     | 332               | 16.6 | 82.1     | 0.900                                             |
| C1.78-H-ZSM-5 | 201             | 3.17 | 17.7     | 327               | 14.7 | 82.3     | 0.897                                             |
| C2.31-H-ZSM-5 | 202             | 3.19 | 18.2     | 325               | 14.4 | 81.8     | 0.849                                             |
| C2.70-H-ZSM-5 | 210             | 2.06 | 16.1     | 296               | 10.7 | 83.8     | 0.578                                             |

**Table S3.** The surface acid properties of Fe-ZSM-5 and carbon-coated Fe-ZSM-5 with different carbon contents.

| Catalyst       | Weak acid sites |      |          | Strong acid sites |       |          | Desorbed NH <sub>3</sub> mmol/g <sub>cat</sub> |
|----------------|-----------------|------|----------|-------------------|-------|----------|------------------------------------------------|
|                | Temp. (°C)      | Area | Area (%) | Temp. (°C)        | Area  | Area (%) |                                                |
| Fe-ZSM-5       | 204             | 2.00 | 14.66    | 332               | 11.66 | 85.34    | 1.03                                           |
| C0.27-Fe-ZSM-5 | 209             | 2.08 | 16.10    | 328               | 10.87 | 89.90    | 0.981                                          |
| C1.08-Fe-ZSM-5 | 208             | 1.72 | 14.96    | 327               | 9.79  | 85.04    | 0.934                                          |
| C2.30-Fe-ZSM-5 | 210             | 1.79 | 17.27    | 323               | 8.61  | 82.73    | 0.879                                          |
| C3.41-Fe-ZSM-5 | 210             | 1.72 | 17.99    | 312               | 7.89  | 82.01    | 0.857                                          |
| C4.84-Fe-ZSM-5 | 211             | 1.44 | 18.83    | 309               | 6.24  | 81.17    | 0.672                                          |

**Table S4.** The contact angle of water-droplet for H-ZSM-5, carbon-coated H-ZSM-5, Fe-ZSM-5, and carbon-coated Fe-ZSM-5.

| Catalyst       | Contact angle (°) |
|----------------|-------------------|
| H-ZSM-5        | 11.6±0.2          |
| C0.30-H-ZSM-5  | 11.8±0.8          |
| C1.27-H-ZSM-5  | 12.7±0.5          |
| C2.70-H-ZSM-5  | 19.1±1.2          |
| Fe-ZSM-5       | 17.4±0.6          |
| C0.62-Fe-ZSM-5 | 18.2±0.5          |
| C3.41-Fe-ZSM-5 | 20.4±0.6          |
| C4.84-Fe-ZSM-5 | 29.2±0.3          |

**Table S5.** The specific amount of furfuryl alcohol used for the synthesis of carbon-coated H-ZSM-5 and carbon-coated Fe-ZSM-5.

| Catalyst       | Volume of furfuryl alcohol ( $\mu$ L) |
|----------------|---------------------------------------|
| C0.22-H-ZSM-5  | 5.1                                   |
| C0.30-H-ZSM-5  | 13                                    |
| C0.45-H-ZSM-5  | 25                                    |
| C1.27-H-ZSM-5  | 51                                    |
| C1.78-H-ZSM-5  | 76                                    |
| C2.31-H-ZSM-5  | 101                                   |
| C0.27-Fe-ZSM-5 | 5.0                                   |
| C0.62-Fe-ZSM-5 | 9.3                                   |
| C1.08-Fe-ZSM-5 | 19                                    |
| C1.50-Fe-ZSM-5 | 37                                    |
| C2.30-Fe-ZSM-5 | 56                                    |
| C3.41-Fe-ZSM-5 | 93                                    |
| C4.84-Fe-ZSM-5 | 130                                   |

## Reference

- [1] Asghari, A.; Khorrami, M.K.; Kazemi, S.H. Hierarchical H-ZSM5 zeolites based on natural kaolinite as a high-performance catalyst for methanol to aromatic hydrocarbons conversion. *Sci Rep* **2019**, *9*, 17526, doi:10.1038/s41598-019-54089-y.
- [2] Setyaningrum, D.L.; Riyanto, S.; Rohman, A. Analysis of corn and soybean oils in red fruit oil using FTIR spectroscopy in combination with partial least square. *Int. Food Res. J.* **2013**, *20*(4), 1977-1981.
